# Supplementary material for: Conjugated porous polyimide poly(2,6-diaminoanthraquinone) benzamide with good stability and high-performance as a cathode for sodium ion batteries
Source: Royal Society of Chemistry journal article supplement (doi:10.1039/d1ta06384g), 2021-08-31
Supplement: d1ta06384g1.pdf [file d1ta06384g1.pdf]

## Supporting Information

### **Conjugated porous polyimide poly(2,6-diaminoanthraquinone) benzamide with good stability and high-performance as cathode for sodium ion batteries**

Yanrui Pang <sup>a,†</sup>, Hao Li <sup>a,†</sup>, Shuanggui Zhang <sup>a,†</sup>, Quanwei Ma <sup>a</sup>, Peng Xiong <sup>a</sup>, Rui Wang <sup>a</sup>, Yunming Zhai <sup>a</sup>, Hongbao Li <sup>a</sup>, Hongwei Kang <sup>b\*</sup>, Yuping Liu <sup>c</sup>, Lin Zhang <sup>c</sup>, Longhai Zhang <sup>a</sup>, Tengfei Zhou <sup>a</sup>, Chaofeng Zhang <sup>a\*</sup>

<sup>a</sup> Institutes of Physical Science and Information Technology, Key Laboratory of Structure and Functional Regulation of Hybrid Material (Ministry of Education), Information Materials and Intelligent Sensing Laboratory of Anhui Province, Leibniz Research Center for Materials Science, Anhui Graphene Engineering Laboratory, Anhui University, Hefei 230601, China.

<sup>b</sup> School of Chemistry and Materials Engineering, Fuyang Normal University, Fuyang 236037, China

<sup>c</sup> Institute for Solid State Physics, Laboratory of Nano and Quantum Engineering (LNQE), Leibniz University Hannover, Appelstrasse 2, Hannover 30167, Germany

† These authors contributed equally to this work

Corresponding Authors: [hongweikang@fynu.edu.cn](mailto:hongweikang@fynu.edu.cn) (H. Kang); [cfz@ahu.edu.cn](mailto:cfz@ahu.edu.cn) (C. Zhang)

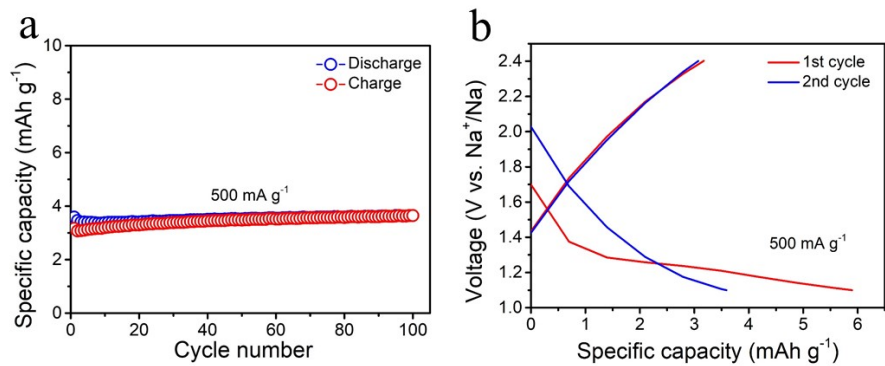

**Fig. S1** Electrochemical properties of PMDA monomer cathode for Na-ion storage at 0.5 A g<sup>-1</sup>. (a) The cycling performance, and (b) charge-discharge voltage profiles for the selected cycles.

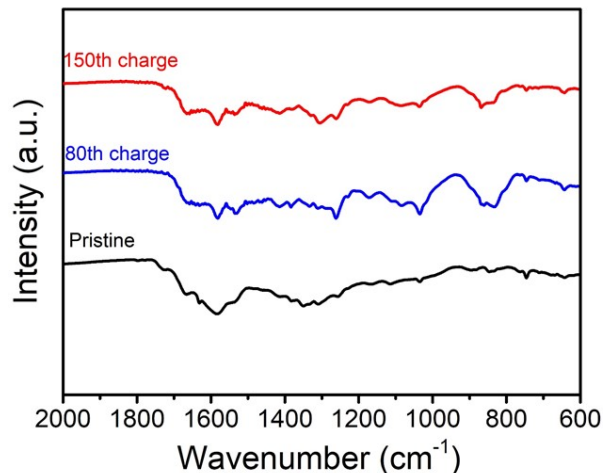

**Fig. S2** *Ex-situ* FT-IR spectra of CP-PDAB electrodes after 80 and 150 cycles.

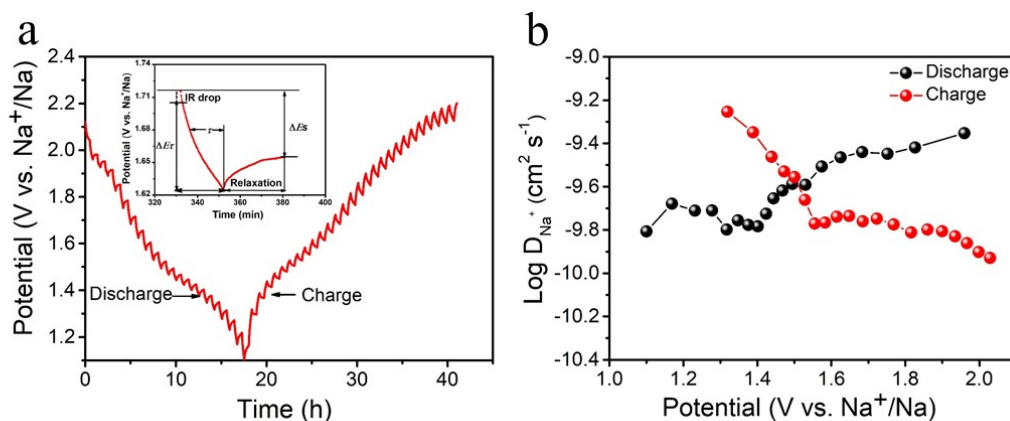

**Fig. S3** (a) GITT curve of CP-PDAB for sodification/desodification process after 10 cycles in SIBs (the inset shows the schematic diagram of calculating the diffusion coefficient of  $\text{Na}^+$ ). (b) Diffusion coefficients at different potential during sodification and desodification for CP-PDAB.

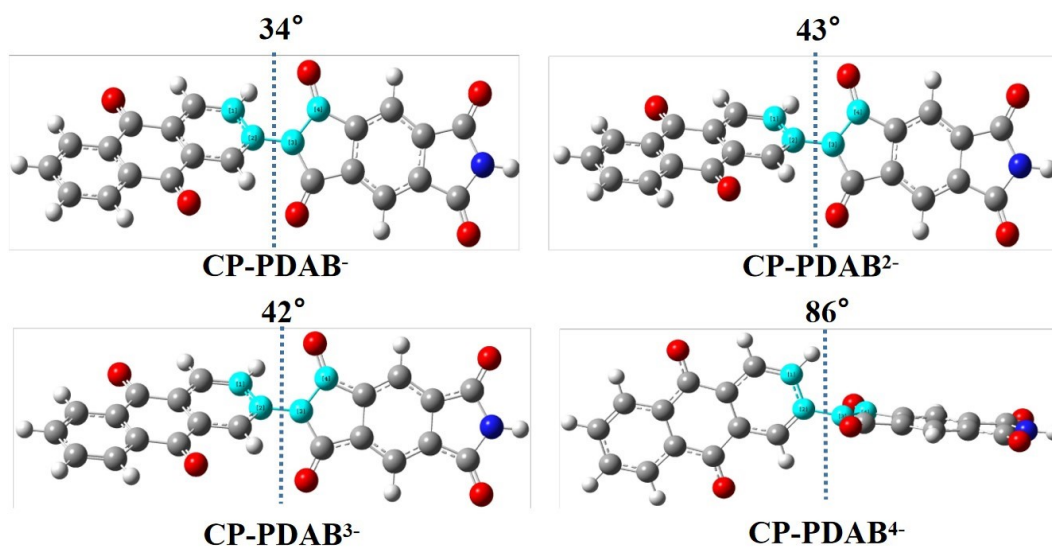

**Fig. S4** The optimized structures of CP-PDAB anions and the related dihedral angles between PMDA and AQ moieties by B3LYP/6-31+G(d,p).



**Table S2** Cartesian coordinates of CP-PDAB<sup>-</sup> (34°).

| Element | x        | y        | z        |
|---------|----------|----------|----------|
| C       | -5.25819 | -0.89636 | 0.223827 |
| C       | -5.44369 | 0.433892 | -0.28381 |
| C       | -4.37443 | 1.291135 | -0.50821 |
| C       | -3.10308 | 0.792685 | -0.20909 |
| C       | -2.91844 | -0.53373 | 0.292358 |
| C       | -3.9905  | -1.39465 | 0.516488 |
| C       | -1.80388 | 1.436381 | -0.33921 |
| N       | -0.84682 | 0.459715 | 0.092087 |
| C       | -1.48968 | -0.75857 | 0.500456 |
| C       | -6.57552 | -1.53215 | 0.346095 |
| N       | -7.48802 | -0.55274 | -0.09396 |
| C       | -6.88635 | 0.653193 | -0.48722 |
| O       | -0.90373 | -1.73862 | 0.946278 |
| O       | -1.5156  | 2.564066 | -0.74064 |
| O       | -6.89679 | -2.65431 | 0.734105 |
| O       | -7.49684 | 1.636786 | -0.90141 |
| C       | 0.545034 | 0.678775 | 0.153281 |
| C       | 1.046354 | 1.940667 | 0.534977 |
| C       | 2.416404 | 2.152209 | 0.606029 |
| C       | 3.325131 | 1.12586  | 0.30696  |
| C       | 2.820783 | -0.13764 | -0.08526 |
| C       | 1.439963 | -0.35171 | -0.16096 |
| C       | 4.776701 | 1.386169 | 0.41135  |
| C       | 5.699174 | 0.259627 | 0.085441 |
| C       | 5.203415 | -0.9974  | -0.32122 |
| C       | 3.737231 | -1.25229 | -0.44031 |
| C       | 7.084639 | 0.459056 | 0.18327  |
| C       | 7.967802 | -0.57435 | -0.11655 |
| C       | 7.474644 | -1.82457 | -0.52105 |
| C       | 6.101895 | -2.03193 | -0.623   |
| O       | 5.223446 | 2.486369 | 0.75509  |
| O       | 3.319148 | -2.3469  | -0.82288 |
| H       | -4.51686 | 2.296488 | -0.89225 |
| H       | -3.84403 | -2.40048 | 0.897876 |
| H       | 0.354267 | 2.741909 | 0.758141 |
| H       | 2.8107   | 3.118154 | 0.903387 |
| H       | 1.079558 | -1.32836 | -0.45501 |
| H       | 7.439321 | 1.435383 | 0.496907 |
| H       | 9.039417 | -0.41209 | -0.03774 |
| H       | 8.163817 | -2.63154 | -0.75476 |
| H       | 5.694361 | -2.9883  | -0.9339  |

|   |          |          |          |
|---|----------|----------|----------|
| H | -8.48621 | -0.70495 | -0.12175 |
|---|----------|----------|----------|

**Table S3** Cartesian coordinates of CP-PDAB<sup>2-</sup> (43°).

| Element | x        | y        | z        |
|---------|----------|----------|----------|
| C       | -5.29316 | -0.86474 | 0.275271 |
| C       | -5.44405 | 0.438402 | -0.3442  |
| C       | -4.34725 | 1.247496 | -0.61907 |
| C       | -3.0866  | 0.7595   | -0.26294 |
| C       | -2.93596 | -0.5359  | 0.347676 |
| C       | -4.02603 | -1.35268 | 0.61709  |
| C       | -1.7751  | 1.355469 | -0.43894 |
| N       | -0.84724 | 0.39784  | 0.07086  |
| C       | -1.51275 | -0.7628  | 0.588394 |
| C       | -6.60878 | -1.45513 | 0.429736 |
| N       | -7.49633 | -0.48803 | -0.10214 |
| C       | -6.86821 | 0.672011 | -0.58143 |
| O       | -0.94431 | -1.70508 | 1.1372   |
| O       | -1.45163 | 2.445434 | -0.93219 |
| O       | -6.99083 | -2.5406  | 0.901126 |
| O       | -7.47489 | 1.633773 | -1.0808  |
| C       | 0.553125 | 0.616022 | 0.159699 |
| C       | 1.037078 | 1.859034 | 0.635188 |
| C       | 2.399872 | 2.075297 | 0.739044 |
| C       | 3.335891 | 1.081495 | 0.382384 |
| C       | 2.846622 | -0.16847 | -0.10471 |
| C       | 1.456062 | -0.37757 | -0.20598 |
| C       | 4.768941 | 1.360377 | 0.520919 |
| C       | 5.686217 | 0.280052 | 0.121068 |
| C       | 5.204053 | -0.96583 | -0.3792  |
| C       | 3.762237 | -1.24209 | -0.52294 |
| C       | 7.079099 | 0.479661 | 0.231211 |
| C       | 7.978528 | -0.5105  | -0.13675 |
| C       | 7.500634 | -1.74537 | -0.63266 |
| C       | 6.134618 | -1.95971 | -0.74913 |
| O       | 5.203677 | 2.45817  | 0.956583 |
| O       | 3.353747 | -2.33469 | -0.98362 |
| H       | -4.46351 | 2.221196 | -1.08664 |
| H       | -3.8991  | -2.32942 | 1.075572 |
| H       | 0.329772 | 2.636779 | 0.897139 |
| H       | 2.785788 | 3.022428 | 1.103052 |
| H       | 1.107718 | -1.33696 | -0.56811 |
| H       | 7.415425 | 1.438482 | 0.614727 |
| H       | 9.049151 | -0.33745 | -0.04462 |

|   |          |          |          |
|---|----------|----------|----------|
| H | 8.202276 | -2.52538 | -0.92198 |
| H | 5.737227 | -2.8971  | -1.12706 |
| H | -8.49648 | -0.62148 | -0.12804 |

**Table S4** Cartesian coordinates of CP-PDAB<sup>3-</sup> (42°).

| Element | x        | y        | z        |
|---------|----------|----------|----------|
| C       | -5.31965 | -0.87007 | 0.273711 |
| C       | -5.46793 | 0.469254 | -0.34069 |
| C       | -4.34536 | 1.255484 | -0.6102  |
| C       | -3.08453 | 0.75415  | -0.28571 |
| C       | -2.93626 | -0.57207 | 0.313822 |
| C       | -4.04612 | -1.36483 | 0.587092 |
| C       | -1.78202 | 1.3392   | -0.4477  |
| N       | -0.8532  | 0.357657 | 0.051004 |
| C       | -1.53264 | -0.82092 | 0.537857 |
| C       | -6.62469 | -1.43939 | 0.438285 |
| N       | -7.50137 | -0.44816 | -0.07142 |
| C       | -6.86887 | 0.71909  | -0.55107 |
| O       | -0.94571 | -1.78789 | 1.053713 |
| O       | -1.43    | 2.441601 | -0.92109 |
| O       | -7.05078 | -2.53503 | 0.90302  |
| O       | -7.51611 | 1.691628 | -1.03226 |
| C       | 0.546364 | 0.572524 | 0.143618 |
| C       | 1.028264 | 1.823115 | 0.614452 |
| C       | 2.386212 | 2.052354 | 0.729092 |
| C       | 3.343051 | 1.068526 | 0.383611 |
| C       | 2.864327 | -0.19012 | -0.10118 |
| C       | 1.468607 | -0.41115 | -0.20553 |
| C       | 4.768934 | 1.369057 | 0.530364 |
| C       | 5.690533 | 0.309615 | 0.138801 |
| C       | 5.221012 | -0.95275 | -0.36711 |
| C       | 3.795811 | -1.25092 | -0.51481 |
| C       | 7.088078 | 0.518153 | 0.249626 |
| C       | 8.002259 | -0.45646 | -0.115   |
| C       | 7.538352 | -1.70442 | -0.61582 |
| C       | 6.176387 | -1.93149 | -0.73387 |
| O       | 5.187635 | 2.487734 | 0.972804 |
| O       | 3.40188  | -2.35974 | -0.98238 |
| H       | -4.45041 | 2.241335 | -1.05903 |
| H       | -3.92598 | -2.34925 | 1.035193 |
| H       | 0.31176  | 2.597516 | 0.861612 |
| H       | 2.759933 | 3.005859 | 1.0911   |



|   |          |          |          |
|---|----------|----------|----------|
| H | 1.131425 | -1.37796 | -0.55757 |
| H | 7.410146 | 1.482362 | 0.634746 |
| H | 9.072004 | -0.26883 | -0.01971 |
| H | 8.250634 | -2.47741 | -0.90439 |
| H | 5.789686 | -2.87394 | -1.11305 |
| H | -8.50322 | -0.56825 | -0.08639 |

**Table S5** Cartesian coordinates of CP-PDAB<sup>4+</sup> (86°).

| Element | x        | y        | z        |
|---------|----------|----------|----------|
| C       | 5.433351 | -0.00972 | 0.758471 |
| C       | 5.429688 | -0.30344 | -0.70421 |
| C       | 4.210366 | -0.34545 | -1.40729 |
| C       | 3.025907 | -0.11337 | -0.72131 |
| C       | 3.029562 | 0.174776 | 0.712433 |
| C       | 4.217606 | 0.224645 | 1.429054 |
| C       | 1.651904 | -0.07045 | -1.18957 |
| N       | 0.852967 | 0.214529 | -0.03583 |
| C       | 1.657959 | 0.396272 | 1.13435  |
| C       | 6.784391 | -0.01639 | 1.216483 |
| N       | 7.536979 | -0.3069  | 0.052111 |
| C       | 6.778468 | -0.48786 | -1.13054 |
| O       | 1.20002  | 0.693332 | 2.253631 |
| O       | 1.188435 | -0.22654 | -2.33462 |
| O       | 7.348276 | 0.172233 | 2.348149 |
| O       | 7.336773 | -0.75163 | -2.24989 |
| C       | -0.5678  | 0.472972 | -0.08263 |
| C       | -1.0146  | 1.804287 | -0.31767 |
| C       | -2.36491 | 2.088493 | -0.36859 |
| C       | -3.3636  | 1.089149 | -0.19299 |
| C       | -2.91566 | -0.26808 | 0.046351 |
| C       | -1.51134 | -0.52383 | 0.091976 |
| C       | -4.76777 | 1.468328 | -0.26012 |
| C       | -5.69119 | 0.384555 | -0.0682  |
| C       | -5.24859 | -0.99537 | 0.175346 |
| C       | -3.85421 | -1.37013 | 0.241086 |
| C       | -7.09297 | 0.631865 | -0.11002 |
| C       | -8.03923 | -0.36414 | 0.066895 |
| C       | -7.60649 | -1.71322 | 0.304464 |
| C       | -6.2476  | -1.98877 | 0.351605 |
| O       | -5.14943 | 2.695292 | -0.47718 |
| O       | -3.46936 | -2.58584 | 0.455974 |
| H       | 4.195527 | -0.55432 | -2.47625 |
| H       | 4.207941 | 0.446306 | 2.495495 |

|   |          |          |          |
|---|----------|----------|----------|
| H | -0.27195 | 2.588335 | -0.45437 |
| H | -2.71972 | 3.101007 | -0.54723 |
| H | -1.20294 | -1.54917 | 0.272193 |
| H | -7.38934 | 1.664144 | -0.29137 |
| H | -9.10593 | -0.1263  | 0.026522 |
| H | -8.33909 | -2.51198 | 0.446495 |
| H | -5.88517 | -3.00022 | 0.530049 |
| H | 8.543677 | -0.37675 | 0.06365  |
